# Supplementary material for: ZIF-derived porous carbon: a promising supercapacitor electrode material
Source: Royal Society of Chemistry journal article supplement (doi:10.1039/c4ta00475b), 2014-06-09
Supplement: c4ta00475b1.pdf [file c4ta00475b1.pdf]

## Supporting Information

### ZIF-derived porous carbon: A conductive-agent-free supercapacitor electrode material

Peng Zhang, Fang Sun, Zhigang Shen and Dapeng Cao\*

State Key Lab of Organic-Inorganic Composites, Beijing University of Chemical  
Technology, Beijing 100029, P.R. China

\*Corresponding author. Email: [caodp@mail.buct.edu.cn](mailto:caodp@mail.buct.edu.cn) Tel: [+8610-64443254](tel:+8610-64443254)

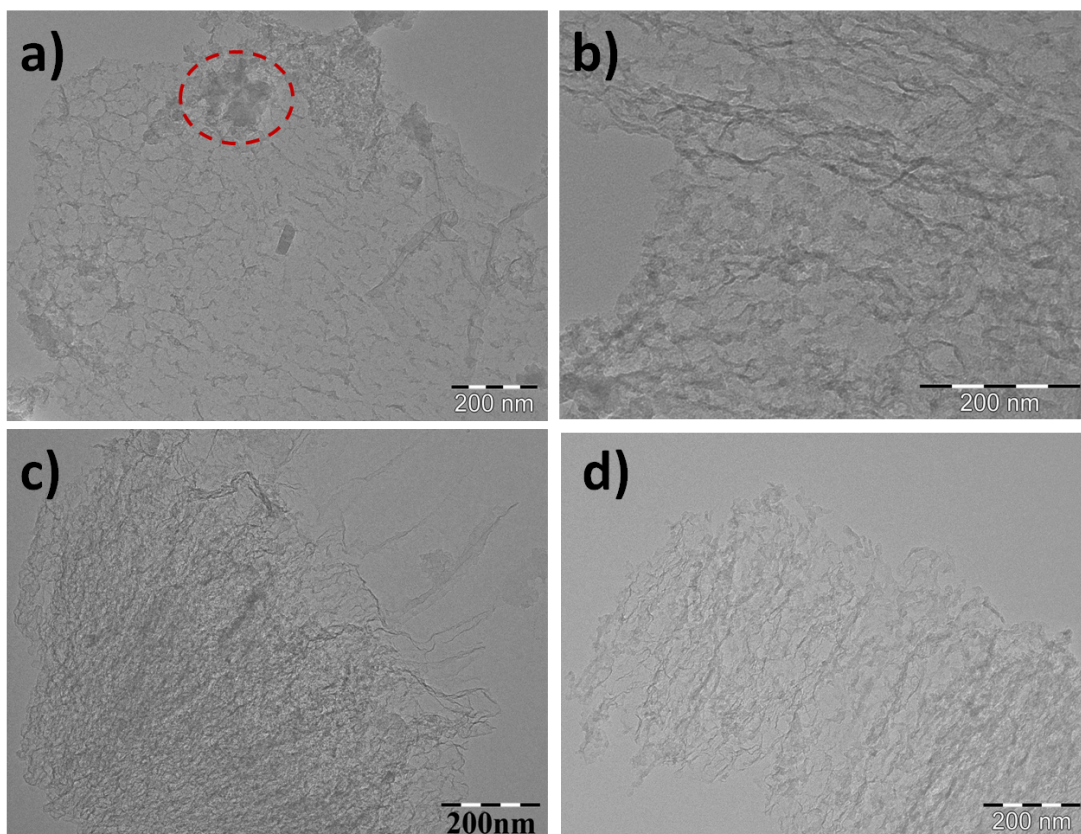

**Fig.S1** TEM image of Carbon-L-T, T= a)750, b)850, c)950, d)1000°C

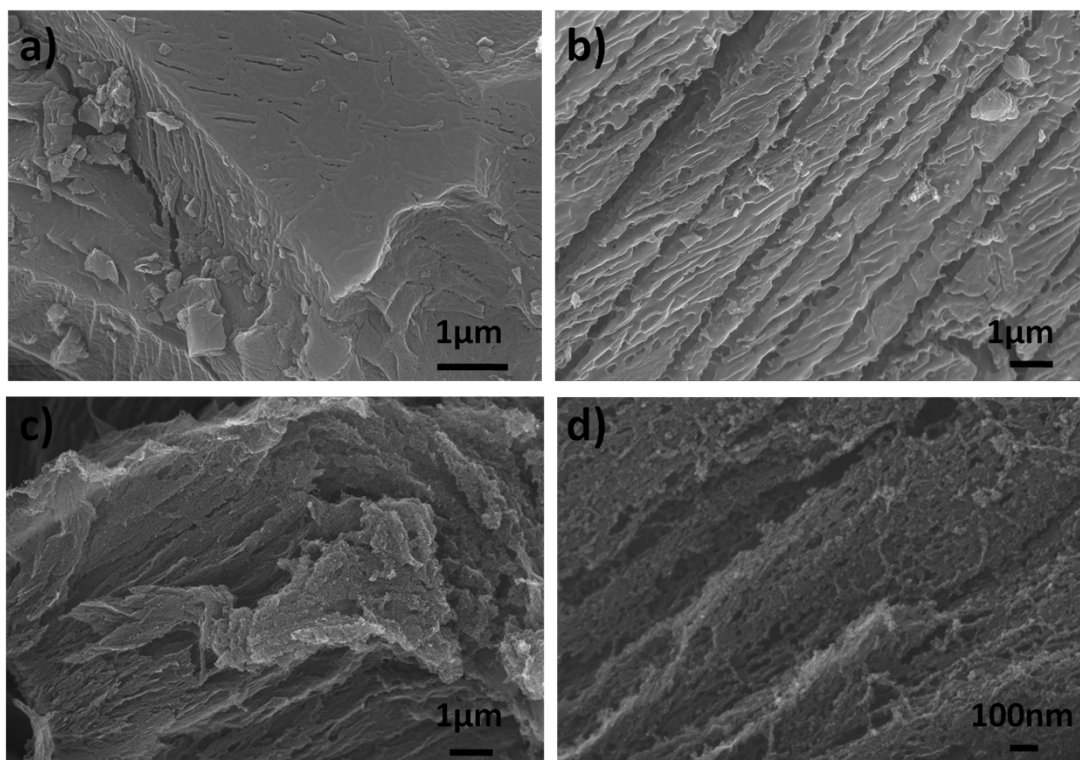

**Fig.S2** SEM images of ZIF-derived porous carbons with different additional carbon sources: a) Carbon-F-950, b) Carbon-G-950, c) and d) Carbon-E-950

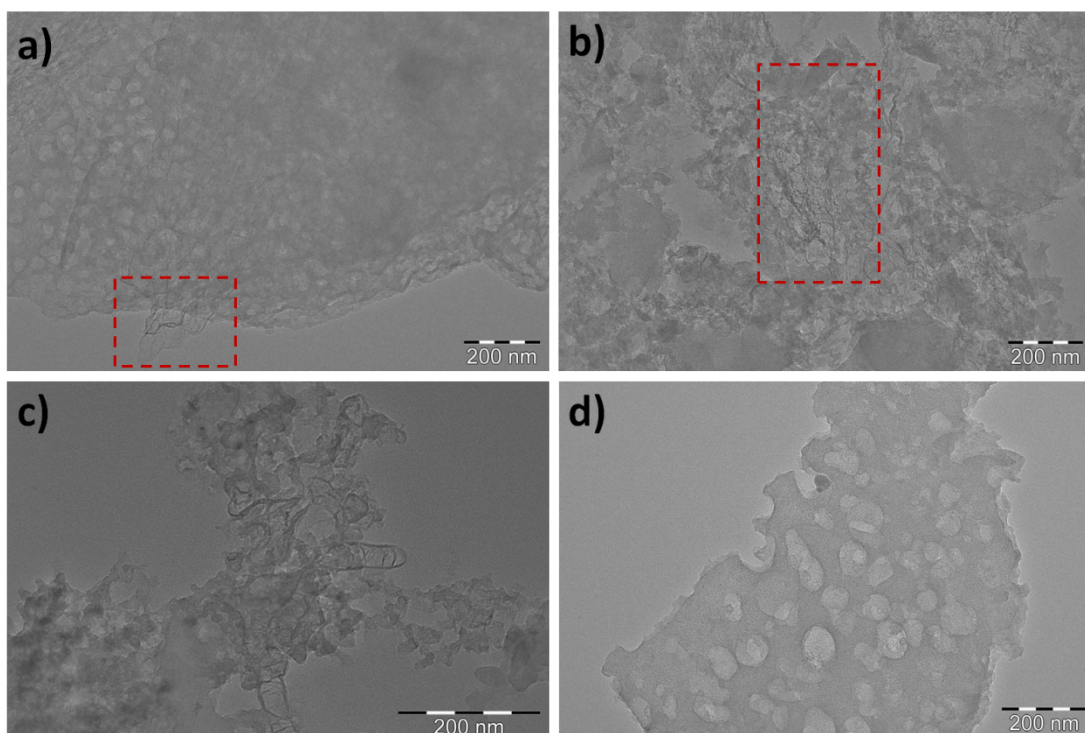

**Fig.S3** TEM images of ZIF-derived porous carbons with different additional carbon sources a)

Carbon-F-950, b) Carbon-G-950, c) Carbon-E-950 and d) Carbon-Z-950

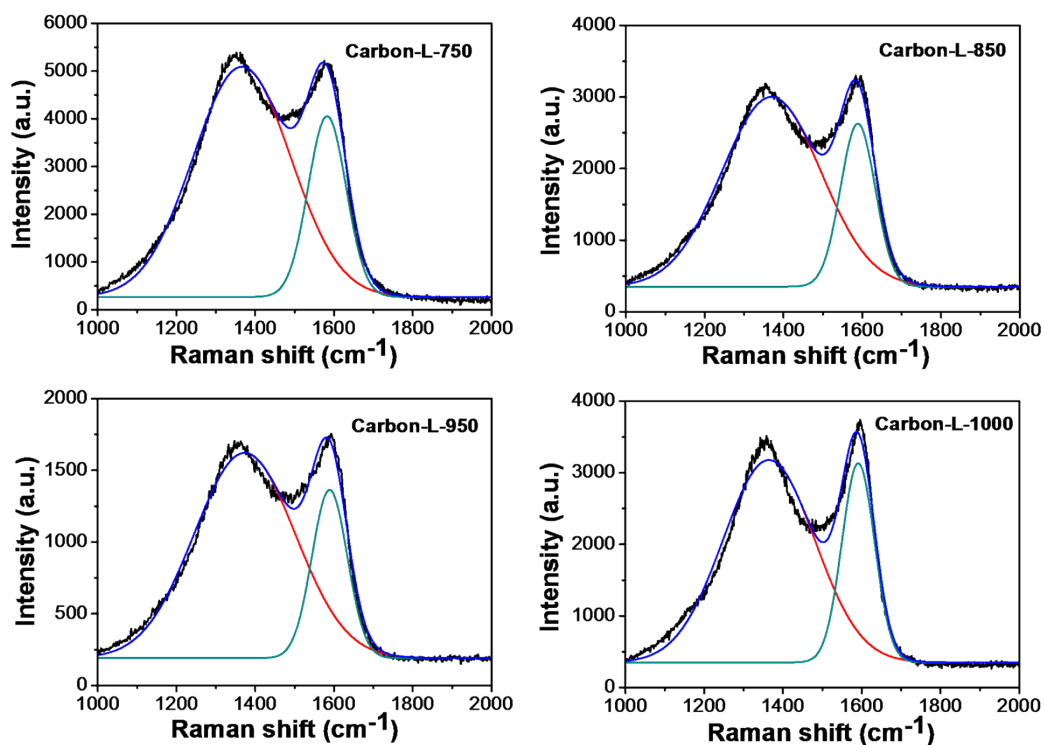

Fig S4 Deconvolution of the Raman spectrum of Carbon-L-T

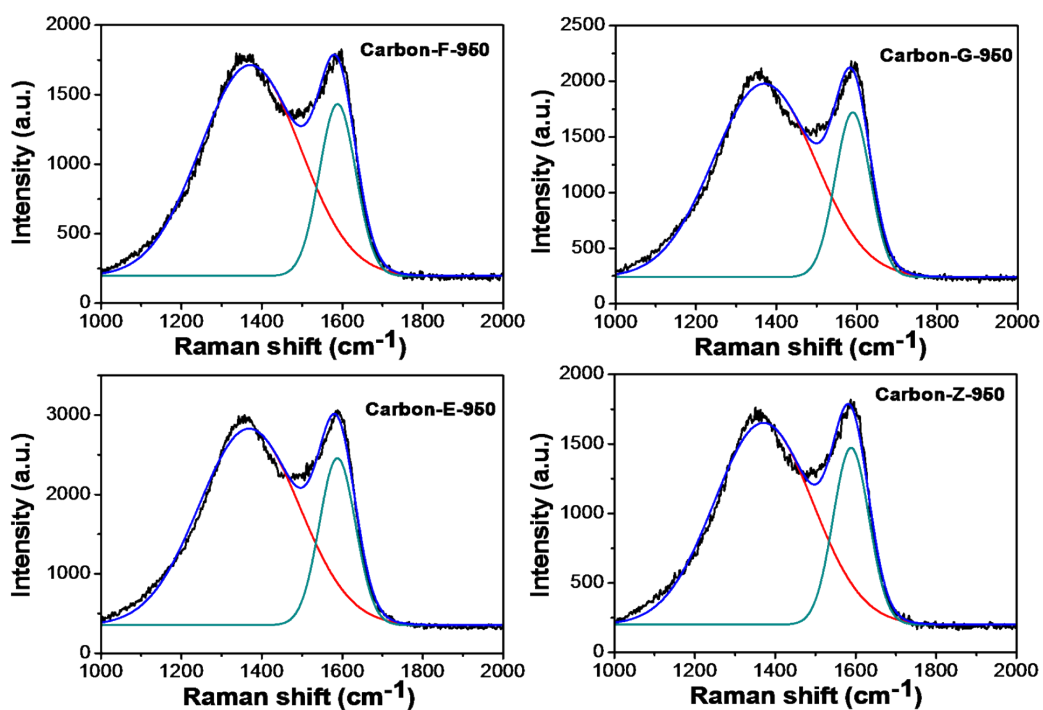

Fig S5 Deconvolution of the Raman spectrum of ZIF-derived porous carbons with different additional carbon sources

**Tab.S1** The  $I_G/I_D$  of ZIF-derived porous carbons

|                             |              |              |              |               |
|-----------------------------|--------------|--------------|--------------|---------------|
| <b>Samples</b>              | Carbon-L-750 | Carbon-L-850 | Carbon-L-950 | Carbon-L-1000 |
| <b><math>I_G/I_D</math></b> | 1.02         | 1.07         | 1.08         | 1.14          |
| <b>Samples</b>              | Carbon-F-950 | Carbon-E-950 | Carbon-G-950 | Carbon-Z-950  |
| <b><math>I_G/I_D</math></b> | 1.05         | 1.08         | 1.08         | 1.08          |

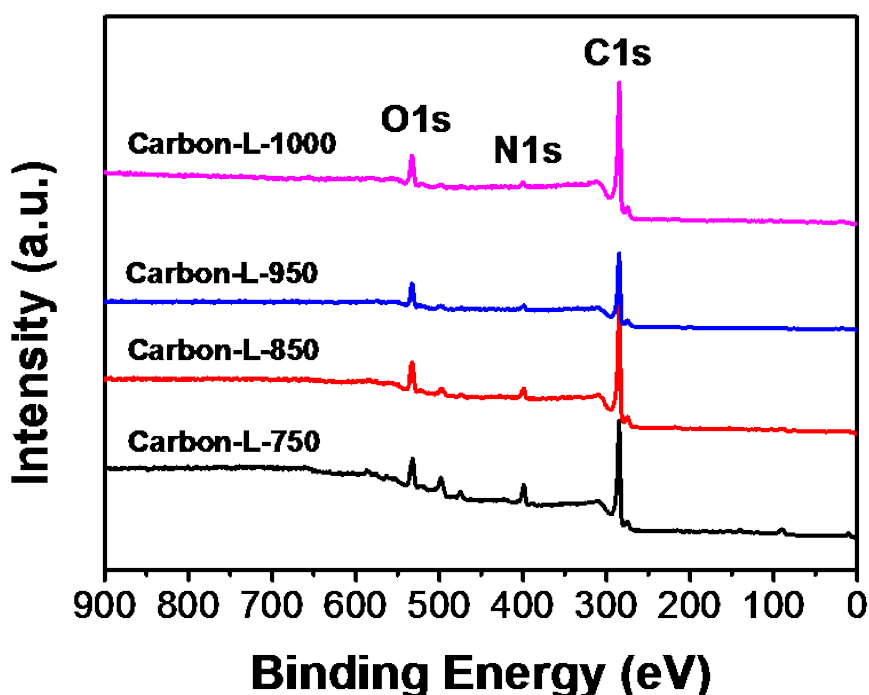

**Fig.S6** XPS spectra of as-prepared Carbon-L-T

XPS analysis (Fig.S6) approves the existence of nitrogen and oxygen atoms in the ZIF-derived porous carbons. The N-containing benzimidazole ligands in ZIF-7 framework are sources of nitrogen atoms. With the carbonization temperature increasing, the nitrogen content of Carbon-L-T was gradually decreased. The presence of oxygen can be attributed to moisture, atmospheric  $O_2$ , or  $CO_2$  adsorbed on ZIF-derived carbon as well as the residual oxygen-containing groups from ZIF-7 (nitroxyl group) and glucose (hydroxyl group, carbonyl group). As N and O functional groups

are all electrochemically active to provide pseudocapacitance, it appears that both of them may participate in the pseudocapacitance reaction.<sup>1</sup>

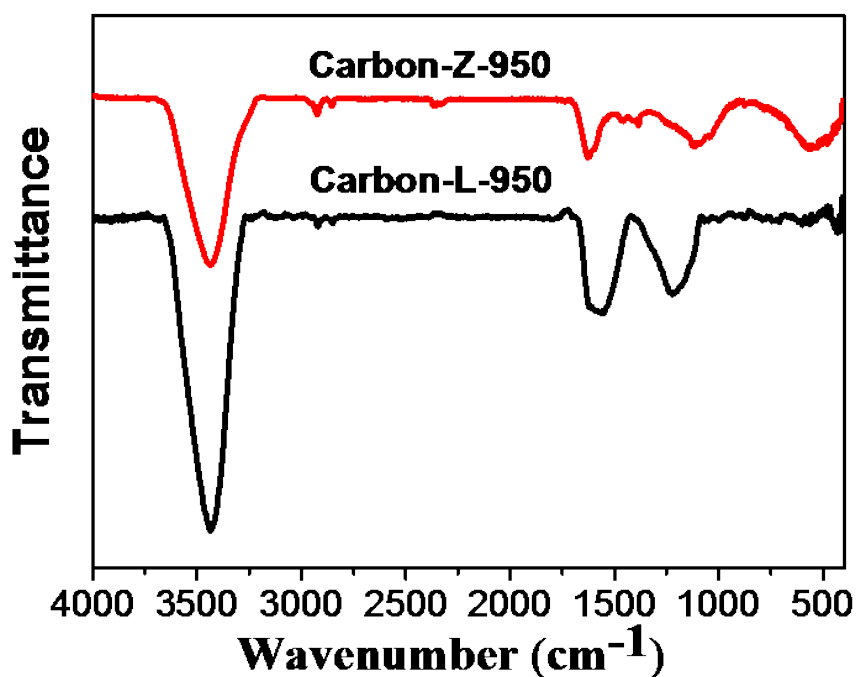

**Fig.S7** FT-IR spectra of as-prepared Carbon-L-950 (black line) and Carbon-Z (red line) from 400 to 4000 cm<sup>-1</sup>

Fig S7 shows the FT-IR spectra of Carbon-L-950 and Carbon-Z-950, which may provide more information about local structures. All samples share a stretching band at 3437cm<sup>-1</sup>, which indicates the existence of the hydroxyl group and adsorbed water molecules. The C=O of carboxyl group in Carbon-L-950 with glucose and C=C of aromatic ring in ZIF-7 derived porous carbon are revealed by the band at 1640 cm<sup>-1</sup> and 1580 cm<sup>-1</sup>, respectively. They are overlapped to become a broad absorption peak.<sup>2</sup> In the region 1300~1000cm<sup>-1</sup>, the more complex bands may be assigned to C-O groups.<sup>3</sup> The result of FT-IR reveals that there are abundant of -OH and C=O groups on the surface of Carbon-L-950. Actually, O-containing functional groups



improve the wettability of the carbon electrode with the electrolyte.<sup>4, 5</sup> The same result can be proved well by their contact angle measurement (Fig S8).

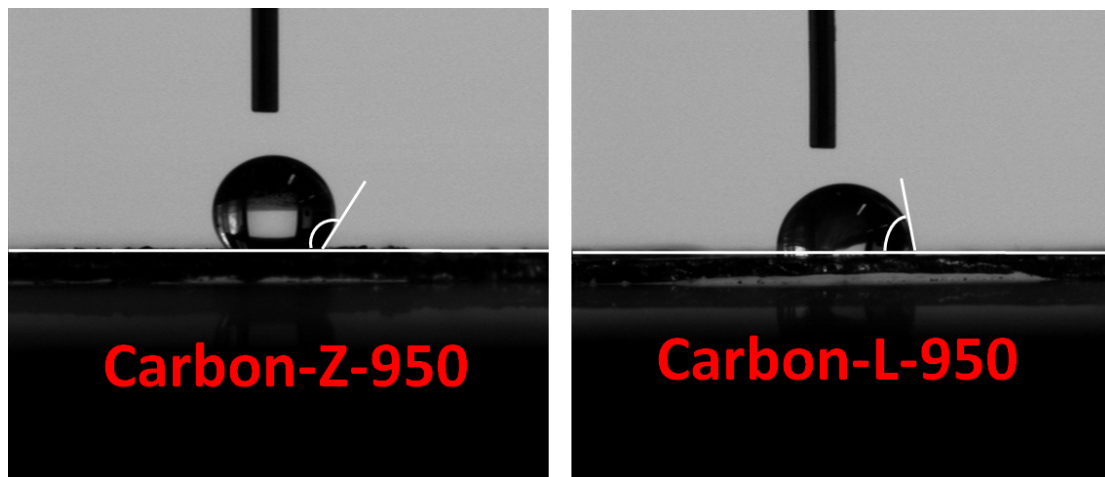

**Fig.S8** 6M KOH solution droplet (2.5 $\mu$ L) on the surface of Carbon-Z-950 and Carbon-L-950

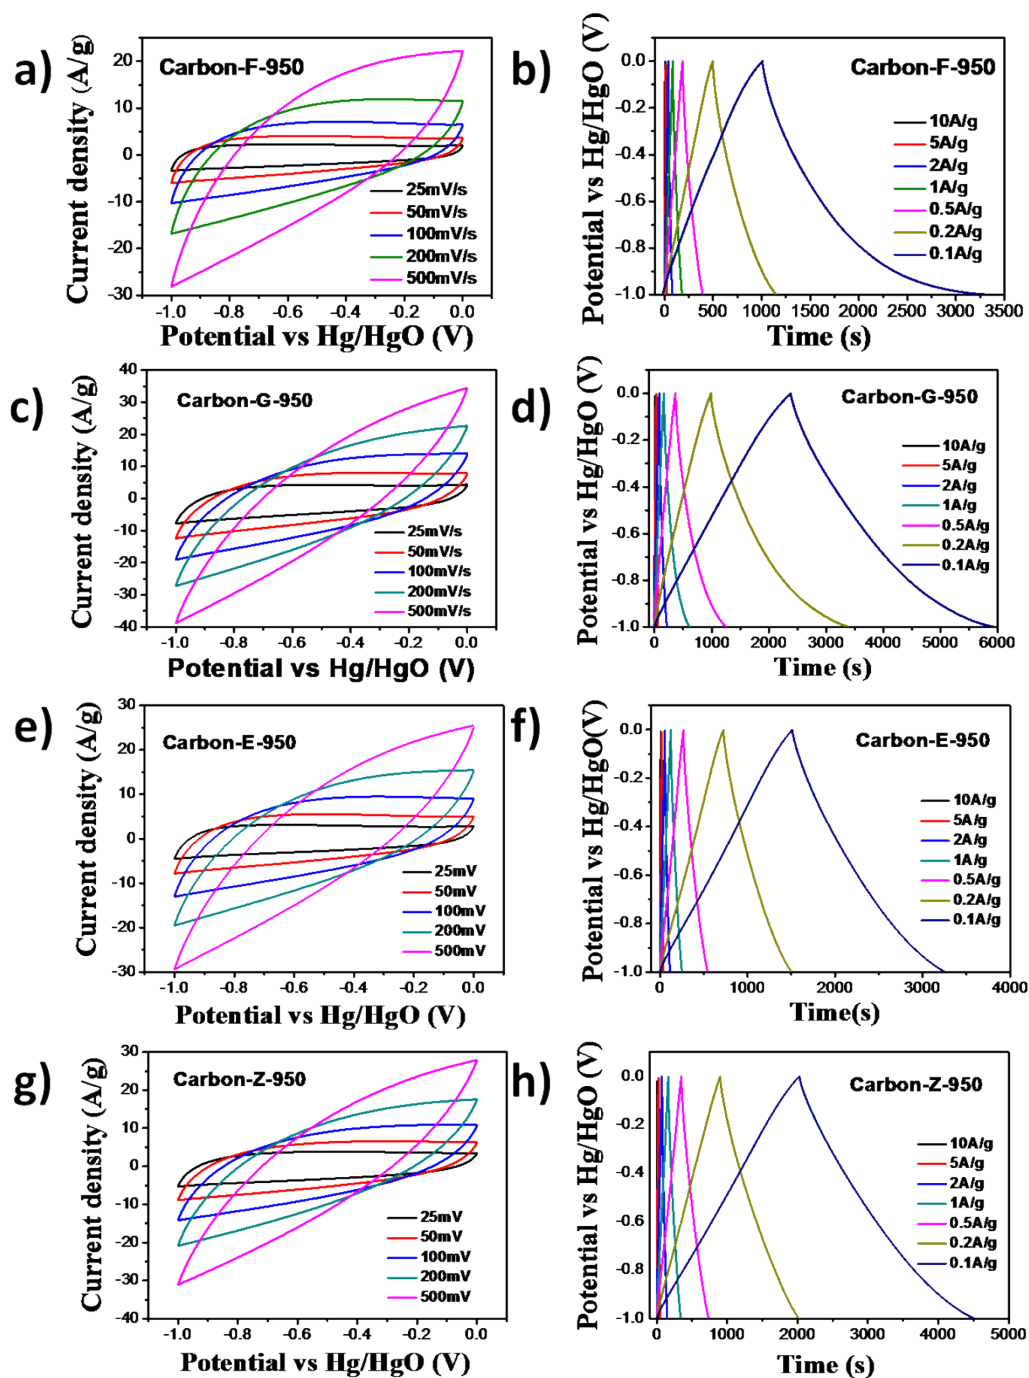

Fig.S9 CV curves at various scan rates and charge-discharge curves at different current densities of ZIF-derived porous carbons obtained by different additional carbon sources

Except for Eq.1, the specific capacitance ( $C$ ,  $F\ g^{-1}$ ) was also calculated from CV curves by using the following equation:

$$C = \frac{\int IdV}{2 \times s \times \Delta V \times m}$$

(Eq.S1)

where  $I$  (A) is the current,  $\Delta V$  (V) refers to the potential change,  $s$  ( $mV\ s^{-1}$ ) is scan rate, and  $m$  (g) is the mass of ZIF-derived porous carbons in the working electrode.

The specific capacitances of ZIF-derived porous carbons from CV and charge-discharge curves in this work are summarized in Tab S2.



**Tab.S2** Specific capacitance of ZIF-derived porous carbons at different current density and scan rate (F/g)

| Conditions<br>Samples | Current density (A/g) |              |              |              |              |            |            | Scan rate (mV/s) |              |              |               |              |
|-----------------------|-----------------------|--------------|--------------|--------------|--------------|------------|------------|------------------|--------------|--------------|---------------|--------------|
|                       | 0.1                   | 0.2          | 0.5          | 1            | 2            | 5          | 10         | 25               | 50           | 100          | 200           | 500          |
| <b>Carbon-L-750</b>   | —                     | 127.6        | 76           | 53.4         | 34.8         | 14         | 6          | 85               | 31.8         | 21.25        | 15.28         | 8.54         |
| <b>Carbon-L-850</b>   | —                     | 200.72       | 150.5        | 128.8        | 106          | 75         | 52         | 92.2             | 76.4         | 59.55        | 43.7          | 26.21        |
| <b>Carbon-L-950</b>   | <b>228.1</b>          | <b>226.2</b> | <b>222.9</b> | <b>218.6</b> | <b>212.8</b> | <b>195</b> | <b>178</b> | <b>185.2</b>     | <b>167.3</b> | <b>142.5</b> | <b>109.43</b> | <b>63.37</b> |
| <b>Carbon-L-1000</b>  | —                     | 135.4        | 115.8        | 110.2        | 102.4        | 88         | 74         | 101              | 90.2         | 76.4         | 59.4          | 36.08        |
| <b>Carbon-Z-950</b>   | 202                   | 182          | 174.5        | 163          | 146.4        | 113        | 80         | 126.8            | 103.8        | 78.7         | 55.53         | 31.34        |
| <b>Carbon-F-950</b>   | 100.9                 | 99.2         | 92.1         | 85.2         | 76.8         | 62         | 50         | 78.2             | 68.6         | 57.45        | 44.9          | 28.41        |
| <b>Carbon-E-950</b>   | 152                   | 144.8        | 133.5        | 123          | 116.4        | 89         | 68         | 106.4            | 91.6         | 73.45        | 52.05         | 29.19        |
| <b>Carbon-G-950</b>   | 238                   | 198          | 185          | 167          | 164          | 146        | 116        | 162.2            | 134.5        | 102.25       | 70.48         | 38.22        |

1. L. Hou, L. Lian, D. Li, G. Pang, J. Li, X. Zhang, S. Xiong and C. Yuan, *Carbon*, 2013, **64**, 141-149.
2. S. Mo, Z. Sun, X. Huang, W. Zou, J. Chen and D. Yuan, *Synth. Met.*, 2012, **162**, 85-88.
3. Q. Wang, W. Xia, W. Guo, L. An, D. Xia and R. Zou, *Chem Asian J*, 2013, **8**, 1879-1885.
4. Q. Li, R. Jiang, Y. Dou, Z. Wu, T. Huang, D. Feng, J. Yang, A. Yu and D. Zhao, *Carbon*, 2011, **49**, 1248-1257.
5. D. Hulicova - Jurcakova, M. Kodama, S. Shiraishi, H. Hatori, Z. H. Zhu and G. Q. Lu, *Advanced Functional Materials*, 2009, **19**, 1800-1809.
